# Supplementary material for: Effect of Oral Administration of Metronidazole or Prednisolone on Fecal Microbiota in Dogs
Source: PubMed Central journal article supplement (PMC4168260; doi:10.1371/journal.pone.0107909), 2014-09-17
Supplement: pone.0107909.s005.pdf [file pone.0107909.s005.pdf]

Table S1. Relative proportions of predominant bacterial taxa in the dogs with metronidazole administration

|                           | Medians % (min.–max. %) of sequences |                      |                                 |                                  |
|---------------------------|--------------------------------------|----------------------|---------------------------------|----------------------------------|
|                           | day 0                                | day 14               | day 28                          | day 42                           |
| Actinobacteria (phylum)   | 0.38 (0.02–1.20)                     | 3.19* (1.58–5.81)    | 0.17 (0.03–58.24)               | 0.03 <sup>†</sup> (0.02–1.01)    |
| Actinobacteria (class)    | 0.38 (0.02–1.20)                     | 3.19* (1.58–5.81)    | 0.17 (0.03–58.24)               | 0.03 <sup>†</sup> (0.02–1.01)    |
| Actinomycetales           | 0.01 (0.00–0.45)                     | 0.07 (0.02–0.10)     | 0.08 (0.03–58.21)               | 0.02 (0.00–0.17)                 |
| Actinomycetaceae          | 0.00 (0.00–0.02)                     | 0.01 (0.00–0.02)     | 0.01 (0.00–0.03)                | 0.01 (0.00–0.08)                 |
| <i>Actinomyces</i>        | 0.00 (0.00–0.01)                     | 0.01 (0.00–0.01)     | 0.01 (0.00–0.03)                | 0.01 (0.00–0.08)                 |
| Corynebacteriaceae        | 0.01 (0.00–0.39)                     | 0.05 (0.02–0.08)     | 0.05 (0.01–58.07)               | 0.00 (0.00–0.07)                 |
| <i>Corynebacterium</i>    | 0.01 (0.00–0.39)                     | 0.05 (0.02–0.08)     | 0.05 (0.01–58.07)               | 0.00 (0.00–0.07)                 |
| Microbacteriaceae         | 0.00 (0.00–0.01)                     | 0.01 (0.00–0.03)     | 0.00 (0.00–0.01)                | 0.01 (0.00–0.01)                 |
| <i>Leucobacter</i>        | 0.00 (0.00–0.01)                     | 0.01 (0.00–0.03)     | 0.00 (0.00–0.01)                | 0.01 (0.00–0.01)                 |
| Bifidobacteriales         | 0.38 (0.01–0.84)                     | 3.18* (1.48–5.71)    | 0.03 <sup>†</sup> (0.00–0.18)   | 0.02 <sup>†</sup> (0.00–0.84)    |
| Bifidobacteriaceae        | 0.37 (0.01–0.84)                     | 3.18* (1.48–5.71)    | 0.03 <sup>†</sup> (0.00–0.18)   | 0.02 <sup>†</sup> (0.00–0.84)    |
| <i>Bifidobacterium</i>    | 0.37 (0.01–0.84)                     | 3.18* (1.48–5.71)    | 0.03 <sup>†</sup> (0.00–0.18)   | 0.02 <sup>†</sup> (0.00–0.84)    |
| Bacteroidetes             | 2.84 (0.36–9.82)                     | 0.02 (0.00–4.01)     | 4.95 (0.27–8.36)                | 8.27 <sup>†</sup> (0.14–21.26)   |
| Bacteroidia               | 2.84 (0.36–9.82)                     | 0.02 (0.00–4.01)     | 4.95 (0.27–8.36)                | 8.27 <sup>†</sup> (0.14–21.26)   |
| Bacteroidales             | 2.84 (0.36–9.82)                     | 0.02 (0.00–4.01)     | 4.95 (0.27–8.36)                | 8.27 <sup>†</sup> (0.14–21.26)   |
| Bacteroidaceae            | 1.93 (0.07–6.89)                     | 0.01* (0.00–0.04)    | 1.39 (0.15–3.17)                | 5.01 <sup>†</sup> (0.07–7.80)    |
| <i>Bacteroides</i>        | 1.93 (0.07–6.89)                     | 0.01* (0.00–0.04)    | 1.39 (0.15–3.17)                | 5.01 <sup>†</sup> (0.07–7.80)    |
| Porphyromonadaceae        | 0.01 (0.00–0.06)                     | 0.00 (0.00–0.00)     | 0.00 (0.00–0.17)                | 0.02 (0.00–0.22)                 |
| <i>Parabacteroides</i>    | 0.01 (0.00–0.06)                     | 0.00 (0.00–0.00)     | 0.00 (0.00–0.17)                | 0.02 (0.00–0.22)                 |
| Prevotellaceae            | 0.87 (0.26–6.91)                     | 0.00 (0.00–4.00)     | 2.38 (0.04–4.98)                | 2.54 (0.07–15.80)                |
| <i>Prevotella</i>         | 0.87 (0.26–6.91)                     | 0.00 (0.00–4.00)     | 2.38 (0.04–4.98)                | 2.54 (0.07–15.80)                |
| Paraprevotellaceae        | 0.04 (0.00–0.67)                     | 0.00* (0.00–0.00)    | 0.05 (0.00–0.19)                | 0.12 (0.00–0.32)                 |
| S24-7                     | 0.00 (0.00–0.01)                     | 0.00 (0.00–0.01)     | 0.01 (0.00–0.02)                | 0.01 (0.00–0.09)                 |
| Firmicutes                | 85.61 (19.42–98.03)                  | 89.92 (77.01–96.23)  | 78.59 (11.02–99.02)             | 69.97 (41.54–98.51)              |
| Bacilli                   | 4.66 (0.25–11.90)                    | 68.75* (44.00–80.10) | 1.36 <sup>†</sup> (0.73–5.42)   | 3.66 <sup>†</sup> (1.60–10.72)   |
| Lactobacillales           | 0.29 (0.05–11.84)                    | 68.74* (43.84–80.07) | 0.07 <sup>†</sup> (0.03–5.31)   | 0.12 <sup>†</sup> (0.03–4.04)    |
| Enterococcaceae           | 0.01 (0.00–10.59)                    | 2.58 (1.07–8.20)     | 0.00 (0.00–4.70)                | 0.00 (0.00–0.01)                 |
| <i>Enterococcus</i>       | 0.00 (0.00–0.10)                     | 0.11* (0.07–0.35)    | 0.00 (0.00–0.23)                | 0.00 <sup>†</sup> (0.00–0.00)    |
| Lactobacillaceae          | 0.28 (0.01–5.04)                     | 10.13 (0.01–66.89)   | 0.04 (0.01–0.42)                | 0.05 (0.01–4.00)                 |
| <i>Lactobacillus</i>      | 0.13 (0.01–5.02)                     | 6.31 (0.01–66.41)    | 0.01 (0.00–0.42)                | 0.02 (0.01–4.00)                 |
| Streptococcaceae          | 0.01 (0.00–0.17)                     | 58.49* (0.69–71.24)  | 0.03 <sup>†</sup> (0.01–0.13)   | 0.03 <sup>†</sup> (0.02–0.06)    |
| <i>Lactococcus</i>        | 0.00 (0.00–0.00)                     | 0.01 (0.00–0.02)     | 0.00 (0.00–0.01)                | 0.00 (0.00–0.01)                 |
| <i>Streptococcus</i>      | 0.00 (0.00–0.13)                     | 1.16* (0.05–1.61)    | 0.03 (0.00–0.12)                | 0.01 <sup>†</sup> (0.01–0.03)    |
| Turicibacterales          | 2.36 (0.04–5.76)                     | 0.01* (0.00–1.17)    | 0.74 (0.12–1.73)                | 3.58 <sup>†</sup> (1.45–6.66)    |
| Turicibacteraceae         | 2.36 (0.04–5.76)                     | 0.01* (0.00–1.17)    | 0.74 (0.12–1.73)                | 3.58 <sup>†</sup> (1.45–6.66)    |
| <i>Turicibacter</i>       | 2.36 (0.04–5.76)                     | 0.01* (0.00–1.17)    | 0.74 (0.12–1.73)                | 3.58 <sup>†</sup> (1.45–6.66)    |
| Clostridia                | 74.50 (5.93–77.43)                   | 3.45* (0.54–7.67)    | 65.34 <sup>†</sup> (4.62–87.46) | 48.75 <sup>†</sup> (32.31–79.63) |
| Clostridiales             | 73.61 (5.90–76.87)                   | 2.99* (0.46–7.59)    | 64.14 <sup>†</sup> (4.59–87.09) | 47.97 <sup>†</sup> (32.09–78.95) |
| Clostridiaceae            | 40.44 (2.42–51.29)                   | 1.25* (0.02–3.73)    | 35.99 <sup>†</sup> (1.13–65.48) | 20.86 <sup>†</sup> (11.28–49.81) |
| <i>Clostridium</i>        | 38.73 (2.42–51.27)                   | 0.13* (0.02–2.90)    | 35.90 <sup>†</sup> (1.11–65.43) | 20.52 <sup>†</sup> (10.87–49.78) |
| Eubacteriaceae            | 2.30 (0.19–5.04)                     | 1.28 (0.16–8.50)     | 0.83 (0.03–1.40)                | 1.07 (0.85–4.00)                 |
| <i>Eubacterium</i>        | 2.30 (0.19–5.04)                     | 1.28 (0.16–8.50)     | 0.83 (0.03–1.40)                | 1.07 (0.85–4.00)                 |
| Lachnospiraceae           | 16.11 (1.63–18.98)                   | 0.03* (0.01–0.05)    | 13.36 (1.37–20.28)              | 13.64 <sup>†</sup> (9.01–19.60)  |
| <i>Blautia</i>            | 11.01 (0.28–16.44)                   | 0.02* (0.00–0.03)    | 5.08 (0.70–14.72)               | 9.21 <sup>†</sup> (6.36–11.46)   |
| <i>Dorea</i>              | 0.47 (0.10–2.57)                     | 0.01* (0.00–0.01)    | 2.17 (0.02–11.93)               | 1.38 <sup>†</sup> (0.68–5.11)    |
| <i>Roseburia</i>          | 0.00 (0.00–0.09)                     | 0.00 (0.00–0.00)     | 0.02 (0.00–0.26)                | 0.00 (0.00–0.01)                 |
| Peptococcaceae            | 2.44 (0.00–3.50)                     | 0.00* (0.00–0.00)    | 0.12 (0.00–1.61)                | 0.52 (0.00–2.14)                 |
| <i>Peptococcus</i>        | 2.44 (0.00–3.50)                     | 0.00* (0.00–0.00)    | 0.12 (0.00–1.61)                | 0.52 (0.00–2.14)                 |
| Peptostreptococcaceae     | 3.37 (0.21–5.85)                     | 0.27 (0.10–4.27)     | 1.27 (0.32–4.40)                | 4.09 (1.59–6.61)                 |
| <i>Peptostreptococcus</i> | 0.00 (0.00–0.13)                     | 0.01 (0.00–0.02)     | 0.00 (0.00–0.82)                | 0.00 (0.00–0.01)                 |

Table S1. Cont.

|                              | Medians % (min.–max. %) of sequences |                   |                                |                                |
|------------------------------|--------------------------------------|-------------------|--------------------------------|--------------------------------|
|                              | day 0                                | day 14            | day 28                         | day 42                         |
| Ruminococcaceae              | 4.51 (0.81–10.16)                    | 0.03* (0.00–0.32) | 6.02 (0.97–8.05)               | 6.49 <sup>†</sup> (5.13–20.97) |
| <i>Faecalibacterium</i>      | 0.19 (0.00–0.78)                     | 0.00* (0.00–0.00) | 0.17 (0.00–1.90)               | 0.76 <sup>†</sup> (0.00–3.97)  |
| <i>Oscillospira</i>          | 0.00 (0.00–0.09)                     | 0.00 (0.00–0.00)  | 0.00 (0.00–0.01)               | 0.01 (0.00–0.05)               |
| <i>Ruminococcus</i>          | 4.26 (0.60–9.97)                     | 0.03* (0.00–0.32) | 5.65 (0.76–6.24)               | 4.32 <sup>†</sup> (2.68–20.86) |
| Veillonellaceae              | 0.12 (0.03–0.97)                     | 0.00* (0.00–0.01) | 0.40 <sup>†</sup> (0.01–4.90)  | 1.45 <sup>†</sup> (0.07–2.38)  |
| <i>Megamonas</i>             | 0.04 (0.01–0.63)                     | 0.00* (0.00–0.01) | 0.38 (0.00–3.66)               | 0.88 (0.02–1.25)               |
| <i>Phascolarctobacterium</i> | 0.08 (0.02–0.60)                     | 0.00* (0.00–0.00) | 0.06 (0.01–1.18)               | 0.53 <sup>†</sup> (0.03–0.70)  |
| Coriobacteriales             | 0.29 (0.02–0.56)                     | 0.18 (0.06–0.66)  | 0.48 (0.03–0.91)               | 0.41 (0.09–0.55)               |
| Coriobacteriaceae            | 0.29 (0.02–0.56)                     | 0.18 (0.06–0.66)  | 0.48 (0.03–0.91)               | 0.41 (0.09–0.55)               |
| <i>Adlercreutzia</i>         | 0.01 (0.00–0.02)                     | 0.00 (0.00–0.00)  | 0.00 (0.00–0.00)               | 0.01 (0.00–0.04)               |
| <i>Collinsella</i>           | 0.26 (0.02–0.56)                     | 0.18 (0.06–0.65)  | 0.44 (0.02–0.91)               | 0.38 (0.06–0.55)               |
| <i>Slackia</i>               | 0.01 (0.00–0.03)                     | 0.00 (0.00–0.02)  | 0.01 (0.00–0.05)               | 0.02 (0.00–0.03)               |
| Erysipelotrichi              | 10.92 (0.67–20.97)                   | 7.41 (2.93–40.69) | 7.83 (0.96–22.78)              | 7.33 (4.70–26.00)              |
| Erysipelotrichales           | 10.92 (0.67–20.97)                   | 7.41 (2.93–40.69) | 7.83 (0.96–22.78)              | 7.33 (4.70–26.00)              |
| Erysipelotrichaceae          | 5.82 (0.46–20.80)                    | 7.05 (2.93–39.39) | 5.81 (0.95–17.69)              | 5.10 (2.98–25.47)              |
| <i>Allobaculum</i>           | 5.74 (0.46–20.74)                    | 6.75 (1.43–39.35) | 5.61 (0.91–17.68)              | 4.64 (2.87–25.39)              |
| Coprobacillaceae             | 2.65 (0.17–5.32)                     | 0.35 (0.00–1.30)  | 2.02 (0.01–5.09)               | 1.71 (0.52–8.07)               |
| <i>Catenibacterium</i>       | 2.37 (0.13–4.79)                     | 0.33 (0.00–1.30)  | 1.68 (0.00–4.76)               | 1.64 (0.50–7.60)               |
| Fusobacteria (phylum)        | 3.30 (0.88–11.40)                    | 0.00* (0.00–0.01) | 5.84 <sup>†</sup> (0.13–23.98) | 8.79 <sup>†</sup> (0.87–38.85) |
| Fusobacteria (class)         | 3.30 (0.88–11.40)                    | 0.00* (0.00–0.01) | 5.84 <sup>†</sup> (0.13–23.98) | 8.79 <sup>†</sup> (0.87–38.85) |
| Fusobacteriales              | 3.30 (0.88–11.40)                    | 0.00* (0.00–0.01) | 5.84 <sup>†</sup> (0.13–23.98) | 8.79 <sup>†</sup> (0.87–38.85) |
| Fusobacteriaceae             | 3.30 (0.88–11.40)                    | 0.00* (0.00–0.01) | 5.84 <sup>†</sup> (0.13–23.98) | 8.79 <sup>†</sup> (0.87–38.85) |
| <i>Fusobacterium</i>         | 0.00 (0.00–0.12)                     | 0.00 (0.00–0.00)  | 0.00 (0.00–0.08)               | 0.01 (0.00–0.01)               |
| <i>J2-29</i>                 | 1.36 (0.01–1.79)                     | 0.00* (0.00–0.00) | 0.89 (0.01–2.40)               | 1.51 <sup>†</sup> (0.03–13.05) |
| Proteobacteria               | 3.74 (0.11–67.45)                    | 4.18 (2.15–19.64) | 2.90 (0.41–21.19)              | 1.28 (0.41–10.72)              |
| Betaproteobacteria           | 0.21 (0.09–3.24)                     | 0.25 (0.06–1.16)  | 0.39 (0.00–1.62)               | 0.96 (0.03–1.95)               |
| Burkholderiales              | 0.21 (0.09–3.24)                     | 0.25 (0.06–1.16)  | 0.39 (0.00–1.62)               | 0.96 (0.03–1.95)               |
| Alcaligenaceae               | 0.21 (0.09–3.24)                     | 0.25 (0.06–1.16)  | 0.39 (0.00–1.62)               | 0.96 (0.03–1.95)               |
| <i>Sutterella</i>            | 0.21 (0.09–3.24)                     | 0.25 (0.06–1.16)  | 0.39 (0.00–1.62)               | 0.96 (0.03–1.95)               |
| Epsilonproteobacteria        | 0.00 (0.00–21.30)                    | 0.03 (0.00–0.22)  | 0.09 (0.00–19.29)              | 0.02 (0.00–1.84)               |
| Campylobacteriales           | 0.00 (0.00–21.30)                    | 0.03 (0.00–0.22)  | 0.09 (0.00–19.29)              | 0.02 (0.00–1.84)               |
| Helicobacteraceae            | 0.00 (0.00–21.30)                    | 0.03 (0.00–0.22)  | 0.09 (0.00–19.29)              | 0.02 (0.00–1.84)               |
| <i>Helicobacter</i>          | 0.00 (0.00–21.27)                    | 0.03 (0.00–0.22)  | 0.09 (0.00–19.26)              | 0.02 (0.00–1.83)               |
| Gammaproteobacteria          | 1.38 (0.02–45.79)                    | 3.93 (1.96–18.26) | 1.20 (0.18–3.71)               | 0.70 (0.30–6.94)               |
| Aeromonadales                | 1.38 (0.00–40.83)                    | 0.35 (0.02–14.51) | 0.43 (0.17–3.54)               | 0.38 (0.07–6.84)               |
| Succinivibrionaceae          | 1.38 (0.00–40.83)                    | 0.35 (0.02–14.51) | 0.43 (0.17–3.54)               | 0.38 (0.07–6.84)               |
| <i>Anaerobiospirillum</i>    | 1.21 (0.00–40.39)                    | 0.33 (0.02–14.51) | 0.22 (0.00–3.52)               | 0.38 (0.00–6.80)               |
| Enterobacteriales            | 0.00 (0.00–3.42)                     | 3.58* (1.16–4.10) | 0.02 (0.00–0.17)               | 0.00 (0.00–0.59)               |
| Enterobacteriaceae           | 0.00 (0.00–3.42)                     | 3.58* (1.16–4.10) | 0.02 (0.00–0.17)               | 0.00 (0.00–0.59)               |
| <i>Escherichia</i>           | 0.00 (0.00–0.47)                     | 2.78* (0.97–3.54) | 0.01 (0.00–0.17)               | 0.00 <sup>†</sup> (0.00–0.53)  |
| <i>Morganella</i>            | 0.00 (0.00–0.00)                     | 0.14* (0.04–0.94) | 0.00 <sup>†</sup> (0.00–0.00)  | 0.00 <sup>†</sup> (0.00–0.00)  |
| <i>Proteus</i>               | 0.00 (0.00–2.93)                     | 0.24 (0.09–0.52)  | 0.00 <sup>†</sup> (0.00–0.00)  | 0.00 <sup>†</sup> (0.00–0.02)  |
| Pseudomonadales              | 0.00 (0.00–1.09)                     | 0.00 (0.00–0.01)  | 0.00 (0.00–0.75)               | 0.03 (0.00–0.07)               |
| Moraxellaceae                | 0.00 (0.00–0.12)                     | 0.00 (0.00–0.01)  | 0.00 (0.00–0.05)               | 0.01 (0.00–0.07)               |
| <i>Psychrobacter</i>         | 0.00 (0.00–0.03)                     | 0.00 (0.00–0.00)  | 0.00 (0.00–0.04)               | 0.01 (0.00–0.07)               |

Taxa present in at least 3 of 5 dogs (either day 0, 14, 28, or 42) were included in this analysis.

\*Significantly different from day 0 ( $P < 0.05$ ).

†Significantly different from day 14 ( $P < 0.05$ ).
